# Supplementary material
Source: Springer Nature journal article supplement (https://www.springermedizin.de/resource/supplementary/13053_2012_446_MOESM1_ESM.pdf/9673860)

■ 1. quarter ■ 2. quarter ■ 3. quarter ■ 4. quarter

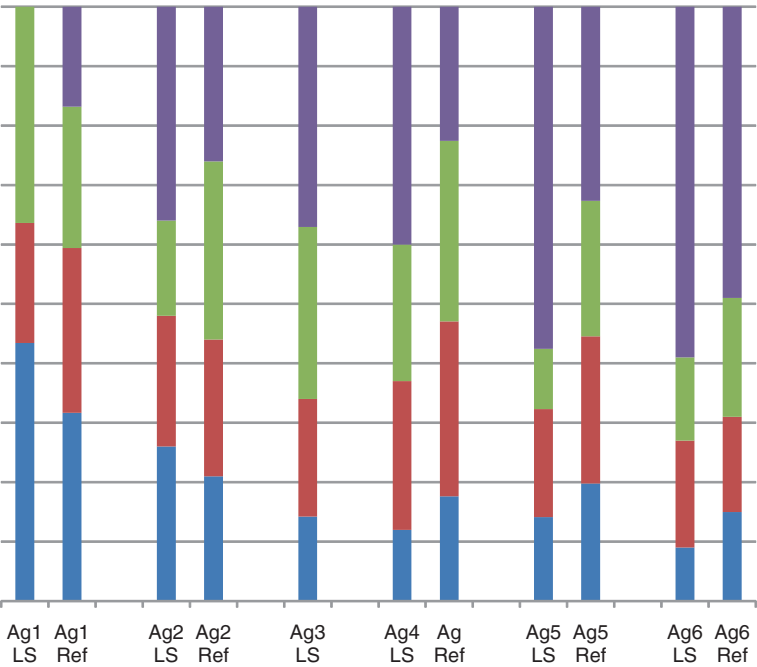

Supplement: MOESM1 [file 9673860]
